# Supplementary material
Source: PubMed Central journal article supplement (PMC4178793)

**Table S1. DNA oligonucleotide probes for RNA and DNA blot hybridization and primers for RCA.**

**Sequence Analysis S1A. Nucleotide and amino acid sequence analysis.**

**Table** summarizes comparison of the complete genome nucleotide sequences of reconstructed BSV species and their gene products (P1, P2 and P3) with those of the Genbank reference sequences of previously isolated and sequenced BSV species. Below the table, **the CLUSTAL alignments** of nucleotide sequences of three selected regions of the BSV genomes reconstructed in this study are shown.

**Sequence Analysis S1B. Conservation of the *cis*-acting elements that drive ribosome shunt and leaky scanning in six BSV species.** The conserved shunt configuration and short ORFs (sORFs) in the pgRNA of BSOLV, BSGFV, BSIMV, BSMYV, BSVNV, BSCAV, RTBV and CaMV are shown. The pgRNA is depicted as a thick line, large ORFs (I, II, and III) as thick line boxes, sORF as thin line boxes and numbers are the position in the virus genome (starting from the PBS / the transcription start site). The conserved sORF 1/1' is boxed in red. Secondary structure of the pgRNA leader, as predicted using Mfold, is depicted schematically above the pgRNA. In all but CaMV, the first two large ORFs are devoid of sORFs. The stability of the structure (*dG*) in kcal/mole is given. 5- and 3'-sequences flanking the main structure are shown in open conformation, since they do not form any extensive structures. The stable structural element (circled at the stem base) and adjacent regions are enlarged alongside. The short ORF 1/1' and ORF I are boxed. AUG codons are in bold; potential non-AUG initiator codons within the shunt landing sequence are underlined. Below the pgRNA, the sequences at the junctions of ORFs I and ORFs II and III are shown with genome positions of the corresponding stop and start codons indicated.

**Table S1. DNA oligonucleotide probes for RNA and DNA blot hybridization and primers for RCA**

| Name                                       | Sequence                   | Detects |
|--------------------------------------------|----------------------------|---------|
| <u>Degenerate primers for RCA:</u>         |                            |         |
| BSV_33_s                                   | 5' TKATGGCWTYATGGGGTAAWWCC |         |
| BSV_1175_as                                | 5' ACHARBTCYTCHACGTCYTYTT  |         |
| BSV_2275_s                                 | 5' ATGGARGYKGAYCTNKCHSAAGG |         |
| BSV_3320_as                                | 5' CKYTCRAAKACYTTDRBRTCAAA |         |
| BSV_4373_s                                 | 5' ARWWBHWHTGYHWRCAVMDTGG  |         |
| BSV_5141_as                                | 5' GCYCCWGTGTCHARDATNGCRTT |         |
| BSV_6055_s                                 | 5' TAYGARTGGCTHGTHATGCCVTT |         |
| BSV_6882_as                                | 5' CCAYCKDRYHCKNGAKGGYTTRT |         |
| <u>Probes for sRNA blot hybridization:</u> |                            |         |
| miR160a_as                                 | 5'tggcatacaggagaccaggca    | miR160  |

|            |    |                           |                                                 |
|------------|----|---------------------------|-------------------------------------------------|
| Gf7166_s   | 5' | CCAGTGTTTTCCAAAGCAGCTGAA  | Leader_up antisense; BSGFV, upstream of PBS     |
| Gf7192_s   | 5' | TTTCAGTCTGTGAGTAGAAAGCAA  | Leader_up antisense; BSGFV, upstream of PBS     |
| Gf152_s    | 5' | ACTGGCATGATTATTTGAATGAAAA | Leader_down antisense; BSGFV, downstream of PBS |
| Gf410_s    | 5' | AAACCCTCAGATAACGTGTCTCAT  | Leader_down antisense; BSGFV, downstream of PBS |
| Gf768_s    | 5' | AAACGATCTGAAGCTGCTGCTCTC  | ORF antisense; BSGFV, ORF I                     |
| Gf1226_s   | 5' | TAAGCTCACAGAACAAATTGGACAA | ORF antisense; BSGFV, ORF II                    |
|            |    |                           |                                                 |
| Gf7166_as  | 5' | TTCAGCTGCCTTTGGAAAACTGCG  | Leader_up sense; BSGFV, upstream of PBS         |
| Gf7192_as  | 5' | TTGCTTTCTACTCACAGACTGAAA  | Leader_up sense; BSGFV, upstream of PBS         |
| Gf152_as   | 5' | TTTTCATTCAATAATCATGCCAGT  | Leader_down sense; BSGFV, downstream of PBS     |
| Gf410_as   | 5' | ATGAGACACGTTATCTGAGGGTTT  | Leader_down sense; BSGFV, downstream of PBS     |
| Gf768_as   | 5' | GAGAGCAGCAGCTTCAGATCGTTT  | ORF sense; BSGFV, ORF I                         |
| Gf1226_as  | 5' | TTGTCCAATTGTTCTGTGAGCTTA  | ORF sense; BSGFV, ORF II                        |
|            |    |                           |                                                 |
| Vn7718_s   | 5' | CCTCTTACATTCTGTCTTGAAAG   | Leader_up antisense; BSVNV, upstream of PBS     |
| Vn7759_s   | 5' | GAGTAGAGAACAAAGATCTTTTGGG | Leader_up antisense; BSVNV, upstream of PBS     |
| Vn199_s    | 5' | TGTGTTTCCAAGTTCTACTGAGAA  | Leader_down antisense; BSVNV, downstream of PBS |
| Vn659_s    | 5' | TCTGGAACGTGTTTATAATCTTGAA | Leader_down antisense; BSVNV, downstream of PBS |
| Vn1154_s   | 5' | TGGTGTCTCGCATCTCTGAACAAC  | ORF antisense; BSVNV, ORF I                     |
| Vn1258_s   | 5' | ACTTCGAACAGAAGTTACTGGGAT  | ORF antisense; BSVNV, ORF I                     |
|            |    |                           |                                                 |
| Vn7718_as  | 5' | CTTCAAGAACAGAATGTAAGAGG   | Leader_up sense; BSVNV, upstream of PBS         |
| Vn7759_as  | 5' | CCCCAAAAGATCTTGTCTCTACTC  | Leader_up sense; BSVNV, upstream of PBS         |
| Vn199_as   | 5' | TTCTCAGTAGAACTTGGAACACACA | Leader_down sense; BSVNV, downstream of PBS     |
| Vn659_as   | 5' | TTCAAGATTATAACCAGTTCAGAGA | Leader_down sense; BSVNV, downstream of PBS     |
| Vn1154_as  | 5' | GTTGTTCAGAGATCGGACAAACCA  | ORF sense; BSVNV, ORF I                         |
| Vn1258_as  | 5' | ATCCCAAGTAATTCTGTTTGAAGT  | ORF sense; BSVNV, ORF I                         |
|            |    |                           |                                                 |
| Cav7357_s  | 5' | AGTGTGAGTAGAGCGCAAGATCCG  | Leader_up antisense; BSCAV, upstream of PBS     |
| Cav7391_s  | 5' | TCCGTGAAATCCGTGCCGTCTCTGG | Leader_up antisense; BSCAV, upstream of PBS     |
| Cav114_s   | 5' | GTTTTATGATAGATAAGTCGAATG  | Leader_down antisense; BSCAV, downstream of PBS |
| Cav299_s   | 5' | ATAGATAGACAGTGAACCTCCGTGA | Leader_down antisense; BSCAV, downstream of PBS |
| Cav811_s   | 5' | TGAAGCGGACTCTCGAGAAGTTGG  | ORF antisense; BSCAV, ORF I                     |
| Cav873_s   | 5' | TATCTGAAGAGACGACCCTTGAAC  | ORF antisense; BSCAV, ORF I                     |
|            |    |                           |                                                 |
| Cav7357_as | 5' | CGGATCTTGCGCTCTACTCACACT  | Leader_up sense; BSCAV, upstream of PBS         |
| Cav7391_as | 5' | CCAGAACGCGACGGATTTCACGGA  | Leader_up sense; BSCAV, upstream of PBS         |
| Cav114_as  | 5' | CATTTCGACTTATCTATCATAAAAC | Leader_down sense; BSCAV, downstream of PBS     |
| Cav299_as  | 5' | TACGGAGTTCACTGTCTATCTAT   | Leader_down sense; BSCAV, downstream of PBS     |
| Cav811_as  | 5' | CCAACCTTCTCGAGAGTCCGCTTCA | ORF sense; BSCAV, ORF I                         |
| Cav873_as  | 5' | GTTCAAGGGTCGTCTCTTCAGATA  | ORF sense; BSCAV, ORF I                         |
|            |    |                           |                                                 |
| OL7332_s   | 5' | TGTGCGAGTTCACTTTGTGCGAGT  | Leader_up antisense; BSOLV, upstream of PBS     |
| OL7364_s   | 5' | AGATCCTAGTTCCGCGAGCGTAGA  | Leader_up antisense; BSOLV, upstream of PBS     |
| OL120_s    | 5' | GAGCTGTATTCAGTCTTTCTTAGA  | Leader_down antisense; BSOLV, downstream of PBS |
| OL379_s    | 5' | TATAAGACTGACTGAACTACAAGC  | Leader_down antisense; BSOLV, downstream of PBS |
| OL777_s    | 5' | TGCAGAACTTAAGTAAGATTGTGC  | ORF antisense; BSOLV, ORF I                     |
| OL2166_s   | 5' | CTCACCAATGTTCCCAACGTCGGA  | ORF antisense; BSOLV, ORF III                   |
|            |    |                           |                                                 |
| OL7332_as  | 5' | ACTCGCACAAAGTGAACCTCGCACA | Leader_up sense; BSOLV, upstream of PBS         |
| OL7364_as  | 5' | TCTACGCTCGCGGAACCTAGGATCT | Leader_up sense; BSOLV, upstream of PBS         |
| OL120_as   | 5' | TCTAAGAAAGACTGAATACAGCTC  | Leader_down sense; BSOLV, downstream of PBS     |
| OL379_as   | 5' | GCTTGTAGTTCAGTCACTCTTATA  | Leader_down sense; BSOLV, downstream of PBS     |
| OL777_as   | 5' | GCACAATCTTACTTAAGTTCTGCA  | ORF sense; BSOLV, ORF I                         |
| OL2166_as  | 5' | TCCGACGTTGGGAACATTGGTGAG  | ORF sense; BSOLV, ORF III                       |
|            |    |                           |                                                 |
| Mys7551_s  | 5' | AAGAATCCTCAGTTTCTTTCATCC  | Leader_up antisense; BSMYV, upstream of PBS     |
| Mys7587_s  | 5' | ACTTCCTGAAATTGGGCAAGCCCC  | Leader_up antisense; BSMYV, upstream of PBS     |
| Mys127_s   | 5' | CTCTGAAGCGAATTTCTGGCAAGT  | Leader_down antisense; BSMYV, downstream of PBS |
| Mys374_s   | 5' | TCCGGACATGATAGTAAACTCTG   | Leader_down antisense; BSMYV, downstream of PBS |
| Mys885_s   | 5' | TTGAGGACTTAAACAGGGAAGTGC  | ORF antisense; BSMYV, ORF I                     |
| Mys909_s   | 5' | AAGCCCTGCGTTCTGACTATCTCT  | ORF antisense; BSMYV, ORF I                     |
|            |    |                           |                                                 |
| Mys7551_as | 5' | GGATGAAGAAAACTGAGGATTCTT  | Leader_up sense; BSMYV, upstream of PBS         |
| Mys7587_as | 5' | GGGGCTTGCCCAATTTCAAGAAAGT | Leader_up sense; BSMYV, upstream of PBS         |
| Mys127_as  | 5' | ACTTGCCAGAAATTCGCTTCAGAG  | Leader_down sense; BSMYV, downstream of PBS     |
| Mys374_as  | 5' | CAGAGTTTACTATCATGTCCGGA   | Leader_down sense; BSMYV, downstream of PBS     |
| Mys885_as  | 5' | GCAGTTCCTGTTTAAAGTCTCAA   | ORF sense; BSMYV, ORF I                         |
| Mys909_as  | 5' | AGAGATAGTCAGAACGCAGGGCTT  | ORF sense; BSMYV, ORF I                         |
|            |    |                           |                                                 |
| Im7686_s   | 5' | CTTTTCTTACAGATGTTCTTGAAA  | Leader_up antisense; BSIMV, upstream of PBS     |
| Im7710_s   | 5' | TCTCTATGAGCAATCATTAGACGA  | Leader_up antisense; BSIMV, upstream of PBS     |
| Im133_s    | 5' | AGAAAGACTAAGAAGAGTATTCTA  | Leader_down antisense; BSIMV, downstream of PBS |
| Im154_s    | 5' | CTATGTTATGATACTACTTGTGAA  | Leader_down antisense; BSIMV, downstream of PBS |
| Im859_s    | 5' | CGTGAACCTACTAATCCAGAACAGG | ORF antisense; BSIMV, ORF I                     |
| Im881_s    | 5' | GGAAGCTTCTGGAAGAACAAGAGC  | ORF antisense; BSIMV, ORF I                     |
|            |    |                           |                                                 |
| Im7686_as  | 5' | TTTCAAGAACATCTGTAAGAAAAAG | Leader_up sense; BSIMV, upstream of PBS         |

Im7710\_as 5' TCGTCTAATGATTGCTCATAGAGA Leader\_up sense; BSIMV, upstream of PBS  
 Im133\_as 5' TAGAATACTCTTCTTAGTCTTTCT Leader\_down sense; BSIMV, downstream of PBS  
 Im154\_as 5' TTCACAAGTAGTATCATAACATAG Leader\_down sense; BSIMV, downstream of PBS  
 Im859\_as 5' CCTGTTCTGGATTAGTAGTTCACG ORF sense; BSIMV, ORF I  
 Im881\_as 5' GCTCTTGTTCTTCCAGAAGCTTCC ORF sense; BSIMV, ORF I

Southern probes for BSV titers:

Cav\_1 5' GGACCAGAAAAAGCAATTGGAAGAATTGCAACACCTCAGT BSCAV  
 Cav\_2 5' TTTGATCGTTAGGCTGCAACAAGAAAATCTTGCTCTCAGG BSCAV  
 Ol\_1 5' CAGGAGGCTCAAAAGAAGACTTATTAGAGTTGCAGAACT BSOLV  
 Ol\_2 5' TGTGTACAAAGACACAACAGGAAGTCTTAGCCTTAAAAGAC BSOLV  
 Im\_1 5' CTGGAAGAACAAGAGCTTCAACTTCAAGAAGTTCACAAGC BSIMV  
 Im\_2 5' AGTGATCAAGCAGAATCAGCTCATCACTACGTTATCTGAG BSIMV  
 Vn\_1 5' GGAAGAACAAGCAGCAGCTGTCTGAAATTAACAACCTAT BSVNV  
 Vn\_2 5' TGATCAAAACAAAATCAGCAGATCACCACCATCTCGGAAGA BSVNV  
 GF\_1 5' AGCAGGAATTACAGCTCCAGGAGATTGGAAAAC'TTCCAA BSGFV  
 GF\_2 5' CTGCAATTACGTATAGAAGTTGCTAGTTTGCAGGAAGAGC BSGFV  
 Mys\_1 5' GAGCTTGAAAAACTTCACAAGAAGCTTGAAGTGTGGAGA BSMYV  
 Mys\_2 5' CGGTGGTCAAAATCAAAGACGACATCGAAGGACTAAAAGA BSMYV

**Supplemental analysis S1A. Nucleotide and amino acid sequence analysis.** Table summarizes comparison of the complete genome nucleotide sequences of reconstructed BSV species and their gene products (P1, P2 and P3) with those of the Genbank reference sequences of previously isolated and sequenced BSV species. Below the table, the CLUSTAL alignments of nucleotide sequences of three selected regions of the BSV genomes reconstructed in this study are shown.

I. Sequence analysis of the isolates of the six BSV species

| New BSV isolate | Length in nts | GenBank access. number | Old isolate acc. No. | Length in nts | Nucleotide identity in %<br>Indels                                                                                                      | Number of amino acid substitutions                                                              | Comments                                                              |
|-----------------|---------------|------------------------|----------------------|---------------|-----------------------------------------------------------------------------------------------------------------------------------------|-------------------------------------------------------------------------------------------------|-----------------------------------------------------------------------|
| BSOLV           | 7,393         | KJ013506               | AJ002234             | 7,389         | 99.6%<br>one 4-nt ins in IGR                                                                                                            | one in P2,<br>ten in P3                                                                         |                                                                       |
| BSGFV           | 7,263         | KJ013507               | AY493509             | 7,263         | 99.2%                                                                                                                                   | one in P1,<br>one in P2,<br>13 in P3                                                            |                                                                       |
| BSIMV           | 7,768         | KJ013508               | HQ659760             | 7,768         | 99.7%<br>one 1-nt del and<br>one 1-nt ins in IGR                                                                                        | one in P1,<br>five in P3                                                                        |                                                                       |
| BSMYV           | 7,652         | KJ013509               | AY805074             | 7,650         | 98.9%<br>two 1-nt ins in IGR                                                                                                            | two in P1,<br>three in P2,<br>14 in P3                                                          |                                                                       |
| BSVNV           | 7,797         | KJ013510               | AY750155             | 7,801         | 99.7%<br>one 1-nt ins in IGR<br>two 1-nt deletions<br>in ORF I, on 3-nt<br>del in ORFIII                                                | six in P3,<br>one aa del in<br>P3 and 31 aa<br>extension in<br>P1                               | Elongated<br>ORF I,<br>similar<br>to other<br>BSVs                    |
| BSCAV           | 7,421         | KJ013511               | HQ593111             | 7,408         | 93.8%<br>several short<br>indels in IGR<br>mostly upstream of<br>PBS, three 1-nt and<br>one 3-nt ins in a<br>short region of ORF<br>III | seven in P1,<br>six in P2,<br>37<br>substitutions<br>and two<br>single aa<br>deletions in<br>P3 | The<br>isolates<br>of two<br>distinct<br>strains<br>of the<br>viruses |

IGR, intergenic region; PBS, Met-tRNA primer binding site; P1, product of ORF I; P2, product of ORF II; P3, product of ORF III; aa, amino acid; del, deletion; ins, insertion

## II. Multiple sequence alignment of the reconstructed BSV genomes using CLUSTAL

CLUSTAL 2.0.12 multiple sequence alignment of a BSV region upstream of the primer binding site  
\* consensus nucleotides

```

BSOLV      GTTAGG-----CCAGAGACATGTGATGATGCTTATCT-GCATTATTGG
BSCAV      GTGTGT-----CCAGAGGTGTGCTGTGACGCGTCCCTTGCATTATTGG
BSIMV      ATTGGTGCCTGCGTGTCATCACTACTCTAGCTTTATTAAGTTTGTTCGGTTGCATTATTGG
BSVNV      ATTG-----TGTTCGGTTGCATTATTGG
BSMYV      CCT-----GGTATTGGCGCTGCGGTTTAAAGCCACGTTTTCGGAAGTCCATGAGTT
BSGFV      CCTAA-----GTTAGTGCCTTCAACGCACATCTGTGTGTAAAGGTAT

                                CCAAT-box
BSOLV      -TGGATGCCACCTAACGATGC-TAGAAAGCTCCACAACCTC-TCTATATAAGGAG--CCTT
BSCAV      -TGGGTGC-ACCTAACGATGC-GGGAAGCCGAAGTCCC--TCTATAAATAGGACCCCGT
BSIMV      -TGCCCTGCGTGTCATCCGAAGC-AACCTTTCGCTTTCTCTA-TCTATAAGAGAGG-CCTT
BSVNV      ATGCCTGCGTGACCCCTAAGC-AATCCCCGCGCCCTCTTC--TCTATAAGAGGAG-CCCTT
BSMYV      -TGAAATCCGACGGCTTTAGTCTGAGAAGGCTCAGCCTTTCTCTATATAAGG--TTTGTA
BSGFV      CTGGCTGTTTCCAGACGCTACCTCCCTCTTTTCTCTCCGCTCTATATAAGGAGG-CAGA
          **                               *****

                                TATA-box
BSOLV      -TGGATGCCACCTAACGATGC-TAGAAAGCTCCACAACCTC-TCTATATAAGGAG--CCTT
BSCAV      -TGGGTGC-ACCTAACGATGC-GGGAAGCCGAAGTCCC--TCTATAAATAGGACCCCGT
BSIMV      -TGCCCTGCGTGTCATCCGAAGC-AACCTTTCGCTTTCTCTA-TCTATAAGAGAGG-CCTT
BSVNV      ATGCCTGCGTGACCCCTAAGC-AATCCCCGCGCCCTCTTC--TCTATAAGAGGAG-CCCTT
BSMYV      -TGAAATCCGACGGCTTTAGTCTGAGAAGGCTCAGCCTTTCTCTATATAAGG--TTTGTA
BSGFV      CTGGCTGTTTCCAGACGCTACCTCCCTCTTTTCTCTCCGCTCTATATAAGGAGG-CAGA
          **                               *****

                                +1 (transcription start site)
BSOLV      GTATTTCAGGTTGCAAACACGCAC----CACACGCGAGTTTACTCCTGATTG-----A
BSCAV      GTATTTCAG-TTGCAAGCACGCAC----CACACGCGAGCTTACTTCTGA--GA-----A
BSIMV      GTAATCAGTTGCAAGCATGCAA--TTCCAC-GCAAGCTTACTTCTGAATTC--TCCA
BSVNV      GCAA-TCAGTTGCAAGCATGCAAGTTTCCACTGCAAGCTTACTTCTGAGTTTGAATTC
BSMYV      ACCCCTCG-TTGCAAGCATAGTCGGAATACAGACTGCTTACTTCTGAGTTTGA--A
BSGFV      ACCTAAGTGTTCAGGCATCGAGGGAATACCCATCTGCCTAATCCACTTCCAG----T
          ** * * * * * * * * * *

BSOLV      GAAATAAAACT-TCTGTGCTTGAAACACACTTTGTGCGAGTTCACTTTGTGCGAGTA--
BSCAV      GAAATAAGAACAATTTGTGCTTGAAATACACCTTGTGTCAAGA-----GTGTGAGTA--
BSIMV      GAAATCAAAGTCAATAGAATCCTTTTCTTACAGA-TGTTCTTGAATCTCTATGAGCAA-
BSVNV      AGTTCAATAAAATTCAGCTTTTCTTCTTACATTCTGTTCTTGAAGGTTTC--GATC---
BSMYV      ATCCCAATAAGATCCTCAGTTTCTTCTATCCTTCTTTCGGTTCACTTCTGAAATTGGG
BSGFV      GTTTTCCAAAGCAGCTGAAGTTT-----CAGTCTGTGAGTA-----GAAAGCAA-
          * * * * * * * * * *

BSOLV      -GAGCGCAAGATCCTAGTTCCGCGAGC-GT-AGACCTATC-----
BSCAV      -GAGCGCAAGATCCGTTGTTGGGAAATCCGTGAAATCCGTGCGGTTCTGGAAATCCG
BSIMV      TCATTGACGAGTAAGAACAAGATCCGCAAGCCCCCCCCCTATA-----
BSVNV      TGATCGAGCGAGTAGAGAACAAGATCTTTTGGGATTTCCGCGCTTCCG-----
BSMYV      CAAGCCCCATAGTAAGGA--AAGATCCATTGTCATAATTCCGCTGCATTCC----
BSGFV      -GATCCTTGTAAGAATTTTGAAGAAGT-TTATATTCGATTTCTCCTCATC-----

```

## CLUSTAL 2.0.12 multiple sequence alignment of the pgRNA leader from six BSVs

```

                                +1 (transcription start site)
BSOLV_L      ACGCAC----CACACGCGAGTTTACTCCTGA-----TTTGAGAAATAAAACT-TCTG
BSCAV_L      ACGCAA----CACACGCGAGCTTACTTCTGA--GA-----AGAAATAAGCAATTTG
BSIMV_L      ATGCAA--TTCCAC-GCAAGCTTACTTCTGAATTC-----TCCAGAAATCAAAGTCAATAG
BSVNV_L      ATGCAAGTTTCCCACTGCAAGCTTACTTCTGAGTTTGAATTCAGTTCAATAAAATTCAG-AG
BSMYV_L      ATAGTCGGAATACCACTGCTTACTGAGTTTGA---AATCCCAATAAGCAATCCTCAG
BSGFV_L      ATCGAGGGAATACCCATCTGCTAATCCACTTCCAGTGTTTTTTCCA-AAGCAGCTGAAG
          * * * * *

BSOLV_L      TGCTTGAAACACACTTTGTGCGAGTTCACTTTGTGCGAGTAGAGCGCA-AGATCCTAGTT
BSCAV_L      TGCTTGAAATACACCTTGTGTCAAGA-----GTGTGAGTAGAGCGCA-AGATCCGTGTT
BSIMV_L      -----AATCCTTTTCTTACAGA-TGTTCTTGAATCTCTATGAGCAATCATTAGACGA
BSVNV_L      -----CTTCTCTTACATTCTGTTCTTGAAGGTT--CGATC--TGATCGAGCGA
BSMYV_L      TTTTCTTCTATCCTTCTTTCG-GTTCACTTCTGAAAT----TGGGCAAGCCCCATAGTA
BSGFV_L      TTTTC-----AGTCTGTGAGTAG----AAAGCA-AGATCCTTGTA
          * *

                                Primer binding site
BSOLV_L      -----CCGCGA----GCGT-AGACCT----ATC--TGGTATCAGAGCAAGGTT----
BSCAV_L      GGGAAATCCGTGAAATCCGTGC-CGTTCTGGAATCCGTGGTATCAGAGCAAGGTT----
BSIMV_L      GTAAAGAACAAGATCCGCAAG-CCCCCCCC--TATAATGGTATCAGAGCTAAGTTTCT
BSVNV_L      GTAGAGAACAAGATCTTTTGGG-ATTTCCGCGCTTCCGTGGTATCAGAGCAAGGTTTCT
BSMYV_L      AGGAAAGATCCATTGGCATAA-TTCCGCTGCATTCC-TGGTATCAGAGCAAGGTTCACT
BSGFV_L      AGAATTTTGAAGAAGTTTATATTCGATTCTCTCTCATGGTATCAGAGCAAGGTT----
          ***** * * *

                                Take-off site for the shunting ribosomes
                                SORF1/1'
BSOLV_L      ---CGTT--TTTATGGCTTTTATGGGGTAAATCCCTTAGATAGGAGCCGAGGGCTCTGC
BSCAV_L      ---AGTT--CTTATGGCTTTTATGGGGTAAATCCCTTAGATAGGAGCCGATGGGCTCTGC
BSIMV_L      GTAAGTT--TTTATGGCTTTTATGGGGTAAATCCCTTAGATAGGAGCCTAAGGGCTCTGC
BSVNV_L      GTAAGTAA--TTTATGGCTTTTATGGGGTAAATCCCTAGATAGGAGCCTAAGGGCTCTGT
BSMYV_L      GTAAGTAAATTTATGGCTTTTATGGGGTAAATCCCTAGATAGGAGCCTAAGGGCTCTTT
BSGFV_L      ---AAGA--TTGATGGCATTCATGGGGTAAATCCCTAAGATAGGGGCTGATTGAGTTCT
          * * * * * * * * * *

```

BSOLV\_L TTTTCTCTAATT-GAGTTACAAGTT---TATGA-----TTTAAATTGTTTAAATTGGAGC  
BSCAV\_L TATTTTTTGATTT-GGGTTAATGGTTGTACAAGT-----TTTATGATAGATAAGTCGAA--  
BSIMV\_L TATGCTTCATTTTGTAGAAAATAGCTGTGTAAGTAGACTTGCATAATGATTCTAGAAAGAC  
BSVNV\_L TATGTTCTATTTTGAGAAAATAACTGTGTAAGTAGTAATGCATGATAAATCGAATAAGTT  
BSMYV\_L TTATGCATATTTCTGAATTTCTGTT--AAGAACTATGCTTTATATACTCTGAAGCGAATT  
BSGFV\_L ACGTTTCTGTTAAGGTAAGATTTCCTTTCCTGATAAGTCGAATAATTTTAA---TGTATC  
\* \* \*

BSOLV\_L TGTATTCACTCTTTCTTA-GAAAAATGAGCATGATT--TCGATTATAGCTGGTCAAGGCT  
BSCAV\_L TGGAGCAACACTTATGTATGAAAAATGATTGCT-TT--ATGATAATAGATGGGCTAGGGT  
BSIMV\_L TAAGAAGAGTATTCT--ATGTTATGATACTA--CTT--GTGAAAGGAAAAAGGATTTCTT  
BSVNV\_L CTTTACGGATGGTCCTAAATTTATGAAATCATCTCTT--TTACTATCTGAGTGAGACCCTT  
BSMYV\_L TCTGGCAAGTAAGTTTTAAGAGGTA-GATGG--TA--ATACCTTATGAGGAGTAATACT  
BSGFV\_L TTTCTCAAGTAATCTTGAAAACTGGCATGATTATTGAATGAAAAATGAGCTATTACCAA  
\* \* \*

BSOLV\_L GTAGGGAAAAATGATTAT--GTTTTATGCTAGTTGGT--CCAAGAGAGCATGCCTACCCA  
BSCAV\_L GTAAGGAAAAATGATCACAAGTCGATCTATTTGTTTCCAAAAGATCATGCCTACCCA  
BSIMV\_L GCGTTTCCAAGTTCTACT--GAAATA-----ATGTCCATCTG  
BSVNV\_L GTGTTTCCAAGTTCTACT--GAGAAATCATGAGTAAAT--GGAGCTTGACACACTGACCTA  
BSMYV\_L ACATATCTAGACTAAGGAACGCTCTTAGGA-----AAGAGGCGATGAGAAGATA  
BSGFV\_L AAACAAAAAATGGAGTTGGGAAGACAGAGGGGTTGTTTGCAGAAGGCCGTTCTAAGCCA  
\* \* \*

BSOLV\_L AGAAAA--AGTACCCGAAGAGAATGGGGAAAAAATTGGTTCTT---CGCATGTATGAGG  
BSCAV\_L AGA-----AGTACCC-----ATGAGGGGGAAGATAGTGGTTCT---CGCATGAGTGAGG  
BSIMV\_L AGAAA-----TGCTTAATATATAGT-----GAAAGG---GA  
BSVNV\_L AGGAAAAAGAAAGATGTGCCTAGGATGAAGTCGAGCACTGTTCTAGGCTGAAGGGTGAAAA  
BSMYV\_L AGGTGA-----CTACTGGGAATAGACGTAAGCCCAT--GTAAGTCCCAG  
BSGFV\_L AGGTTGGGCGTCAAAGGCCGTGTCAGACCCGAGATCTTCTAATATCCTCCTGAGGTAAT  
\*\* \*

BSOLV\_L ATAATATCCTAGAAACAGAACATAAACTGCGTGAAGTACTTACAAAGCCAAGATAATATC  
BSCAV\_L AAGAAATATCATAGATAGACAGTGAACCTCCGTGAAGTACTTACAT-GCTTAGCTGATATC  
BSIMV\_L GAAAAATGACTTGAGTTGGGAGTGTTAGTTTATCGGACTTGGAGCAAAAGAACCAGAACCC  
BSVNV\_L GAAAAATGAGTTGAGTTGGGAGTAAGACTCTGAGAGGCTTGAGGCAAAAGAACCAGAACCC  
BSMYV\_L GAAGGGCAGCTTGTGGCAAAAAGGTGACTCAGTATAAACCCTGAAGATATCGCGTCTCTGTC  
BSGFV\_L AAGCGCTTCGTGAAGTAGTTCAATAATTATGACTAGTTATTAAGA---GAGCTTGGGTA  
\*

BSOLV\_L CTATATAGAAACATGGGCATCGTGAA---GTATAAGACTG-ACTGAACTA-CAAGCTCC  
BSCAV\_L CTATTTAGTGAGGTAGACACCGTGAA---GTAGTACATAA-AAAGCTCCAGTAAGACGT  
BSIMV\_L TTACCTGGCAT-GTAAGACCCAAGGG---GCAGAAGCTGG-AGAACCCTGGTGTGAGTT  
BSVNV\_L TTACCTAGCAAAGTAAGACCCAAGGGAGG-GCAGTAGCTGG-AGAACCCTGGTGTGAGTT  
BSMYV\_L TAATTTAATATCCTGAGACTCCTAAAAATCCGGACATGATAGTAAAACTCTGATAAAG---  
BSGFV\_L AAAGTTAGCATCAAAAGTTAGTAAGACGTAAGGAAGGAAGGAAAACCCTCAGATAACGT  
\* \* \* \*

BSOLV\_L TTTATAAAACAAAAAGATCATAGACCT---CTGTAGGTACGTCAATACGGGTAAAGCATC  
BSCAV\_L AATATCATTAGAACCTCTGTGA--CT---GACCAGGTACGCCAATAGAAAATA-GTATC  
BSIMV\_L TCTT-ATTCGGTATTATTAAAACTCTAGTATCCTCAAAACTTCGTGAAGTATT-----C  
BSVNV\_L TCTTTACCTAGCAGAAGATATACTCTAGTATCCTCAAAACACCGTGAAGTATTTACAACC  
BSMYV\_L -CAAAAGCCTGAAGCTTCGAAATACCTGCTAGCCAGAGATAAACTAAGGAAATTATAAAG  
BSGFV\_L -GTCTCATGAAGGTTACCCCTATCCTTCTATTCTGAAATTACTTCTACCTAAC-----C  
\* \*

BSOLV\_L CTGGAGGAGTACTCCTATCTAGTTTACGAAAAGAAAGTCATTACC-----TTG  
BSCAV\_L CCGGAGGACTTCTCCTACCTTGTATTATCATAAGAAAGTCATCCACC-----TTG  
BSIMV\_L CTT---GAA-ACTATAATATTAGCAATTGATGGTGTCACTAGA-----TCA  
BSVNV\_L CTTTATGAA-CAAGTATTTTCTGGAGTTAGATGTCAGCCACCAAAGATCATGATCTATCA  
BSMYV\_L CCGTG----CTCTTAACCTTTAATTTACAAGAAAAATGCATAAATAACCCGAGGTTCTT  
BSGFV\_L TTGTATG-----

BSOLV\_L CATA-CAATTTATG-----  
BSCAV\_L CAAAACGTTTATG-----  
BSIMV\_L CAAAAAATTTGAGTTGTGCAAGAATGAAAGATTCCGAT-CACATGATAGTTGACTAAAC  
BSVNV\_L CAAACAACTTGAGTCATACAGA--GAAGAACTCAGATGTAAGTGAATGACTAATGATC  
BSMYV\_L TATCCTGCTTCAAAGCCTTTAGTTTAACTTAAACCTTGAACCAAAGCTAATTCTG-----  
BSGFV\_L -----

BSOLV\_L -----  
BSCAV\_L -----  
BSIMV\_L TGAAGACCCCTTTAAGT-CTGAAAGAAAAACAGATGCATGAGCTACCTCTAGAACTGGC  
BSVNV\_L AGGGACCTCTATTAAAGAGCTTAGTAAGAAGTAAGTGCATAAACTACCTCTGGAACTGGT  
BSMYV\_L -----

```

BSGFV_L      -----

BSOLV_L      -----
BSCAV_L      -----
BSIMV_L      TACAATCT-ATTATGAGCATG-GCATCCCAAAGGACTACTCCTATCTGTCTCAAGAATT
BSVNV_L      TATAATCTTGAAATGAGCATATGTATCCCAAAGG-TAACTCCTATCTGTC-CGTGACCAT
BSMYV_L      -----
BSGFV_L      -----

BSOLV_L      -----
BSCAV_L      -----
BSIMV_L      GGTTTAAAAACCTTTGTAA-----CTCTG
BSVNV_L      A----AGAAACCTTCTTTAAAGAAAACTCTG
BSMYV_L      -----
BSGFV_L      -----

```

#### CLUSTAL 2.0.12 multiple sequence alignment

The sequence just upstream of the ORF I

```

BSOLV_L      -----ACAAAAGATCATAGACCTCTGTAGGTACGTCAATACGGGTTAAGCATCCTGG
BSCAV_L      -----CATTAGAACCTC-TGTGACTGACCAGGTACGCCAATAGAAAATA-GTATCCCGG
BSIMV_L      -AGATGCATGAGCTACCTCTAGAAGTGGCTACAATCT-ATTATGAGCATG-GCATCCCAA
BSVNV_L      ----TGCATAAACTACCTCTGGAAGTGGTTATAATCTTGAAATGAGCATATGTATCCCAA
BSMYV_L      -----AGCCGTGCTCTTAAGT-TTAATTACAAGAAAAATGCATAAATAACCCGG
BSGFV_L      ATCAAAAGTTAGTAAGACGTAAGGAAGGAAGGAAGGAAACCCCTCAGATAACGTGTCTCATGA
                *               *               *

BSOLV_L      AGGAGTACTCCTATCTAGTT--TACGAAAAGAA---AG--TCATTACCTTGCATA-CAA
BSCAV_L      AGGACTTCTCCTACCTTGTT--TATCATAAGAA---AG--TCATCCACCTTGCAAAACGT
BSIMV_L      AGGACTACTCCTATCTGTCT--CAAGAATTTGGTTTAA--AAACCTTTGTAA-----
BSVNV_L      AGG-TAACTCCTATCTGTC---CGTGACCATA---AG--AAACCTTCTTTAAAGA-AAA
BSMYV_L      AGG--TTCTTTATCCTGCTT--CAAAGCCTTTAGTTTACTTAAACCTTGAACCAAAGCTA
BSGFV_L      AGG-TTACCCCTATCCTTCTATCTGAAATTACTTCTACCTAACCTTGTATG-----
                ***      *      *               *

BSOLV_L      TTTATG
BSCAV_L      TTTATG
BSIMV_L      -CTCTG
BSVNV_L      ACTCTG
BSMYV_L      ATTCTG
BSGFV_L      -----

```

---

**Sequence Analysis S1B. Conservation of the *cis*-acting elements that drive ribosome shunt and leaky scanning in six BSV species.** The conserved shunt configuration and short ORFs (sORFs) in the pgRNA of BSOLV, BSGFV, BSIMV, BSMYV, BSVNV, BSCAV, RTBV and CaMV are shown. The pgRNA is depicted as a thick line, large ORFs (I, II, and III) as thick line boxes, sORF as thin line boxes and numbers are the position in the virus genome (starting from the PBS / the transcription start site). The conserved sORF 1/1' is boxed in red. Secondary structure of the pgRNA leader, as predicted using MFold, is depicted schematically above the pgRNA. In all but CaMV, the first two large ORFs are devoid of sORFs. The stability of the structure (*dG*) in kcal/mole is given. 5- and 3'-sequences flanking the main structure are shown in open conformation, since they do not form any extensive structures. The stable structural element (circled at the stem base) and adjacent regions are enlarged alongside. The short ORF 1/1' and ORF I are boxed. AUG codons are in bold; potential non-AUG initiator codons within the shunt landing sequence are underlined. Below the pgRNA, the sequences at the junctions of ORFs I and ORFs II and III are shown with genome positions of the corresponding stop and start codons indicated.

Sequence Analysis S1B. Conservation of the cis-acting elements that drive ribosome shunt and leaky scanning in six BSV species.

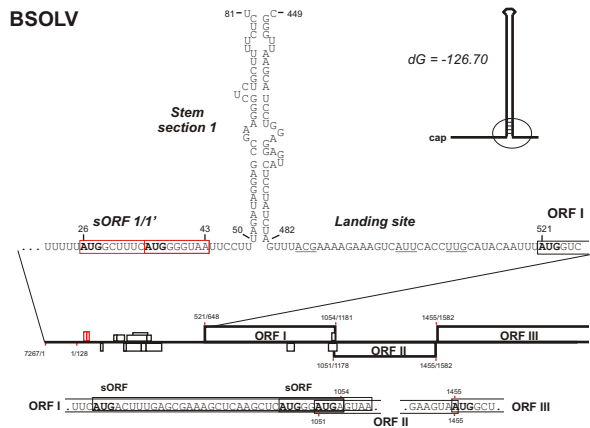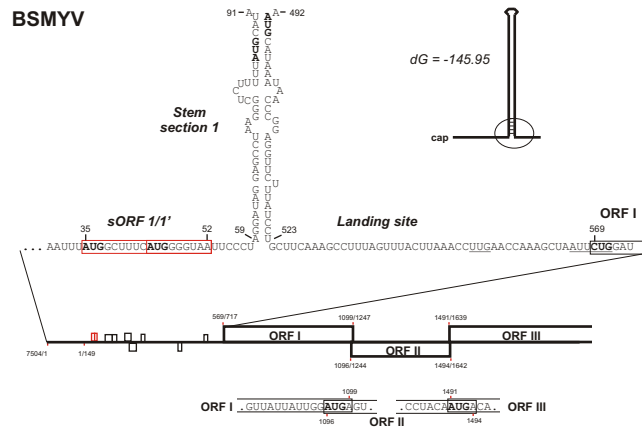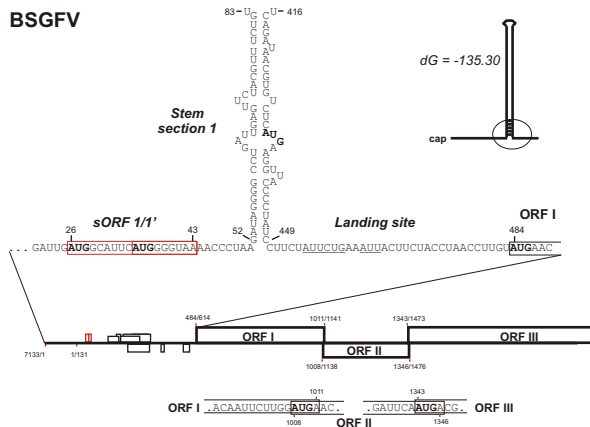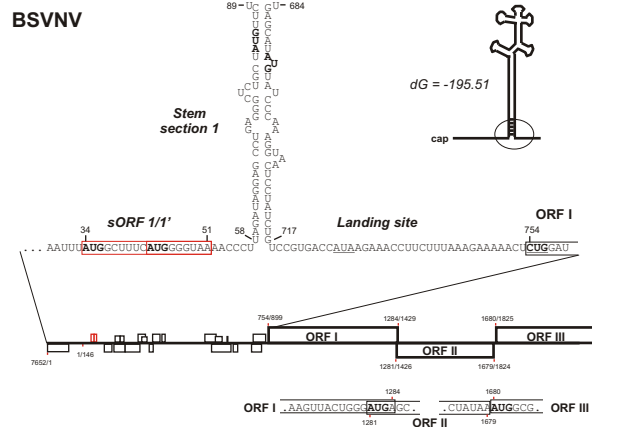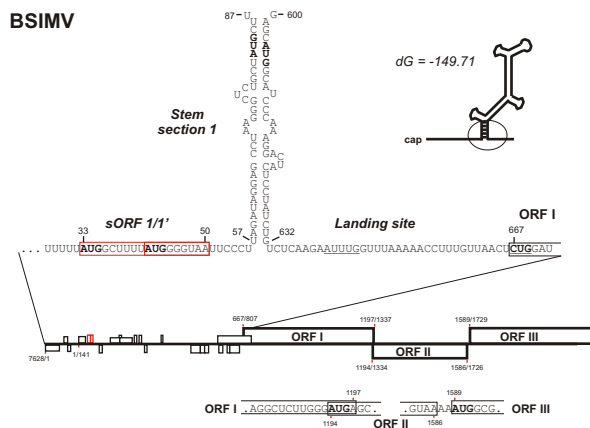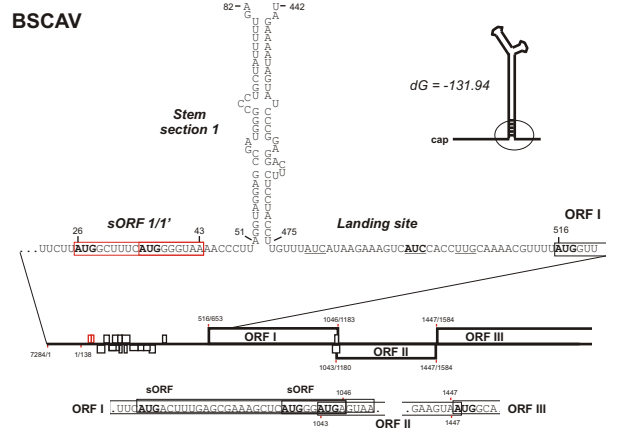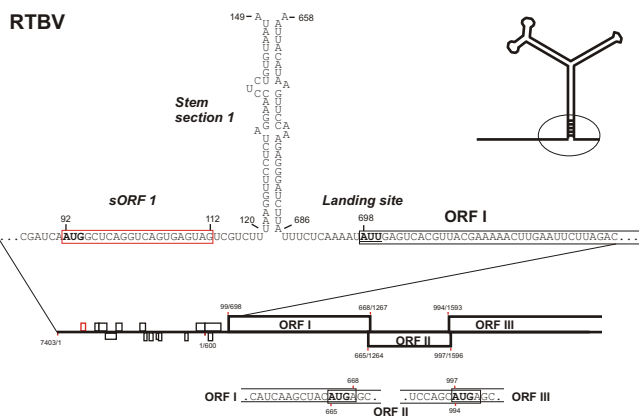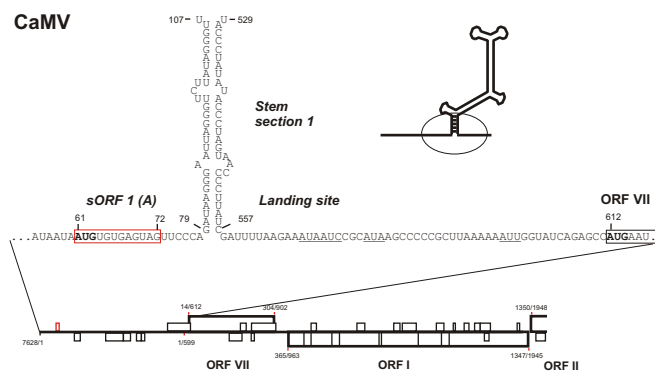

Supplement: JVI.01496-14_zjv999099577so1.pdf [file JVI.01496-14_zjv999099577so1.pdf]
